# Supplementary material for: Evolution of functional antibodies following acute Epstein-Barr virus infection
Source: PubMed Central journal article supplement (PMC9481173; doi:10.1371/journal.ppat.1010738), 2022-09-06

**A**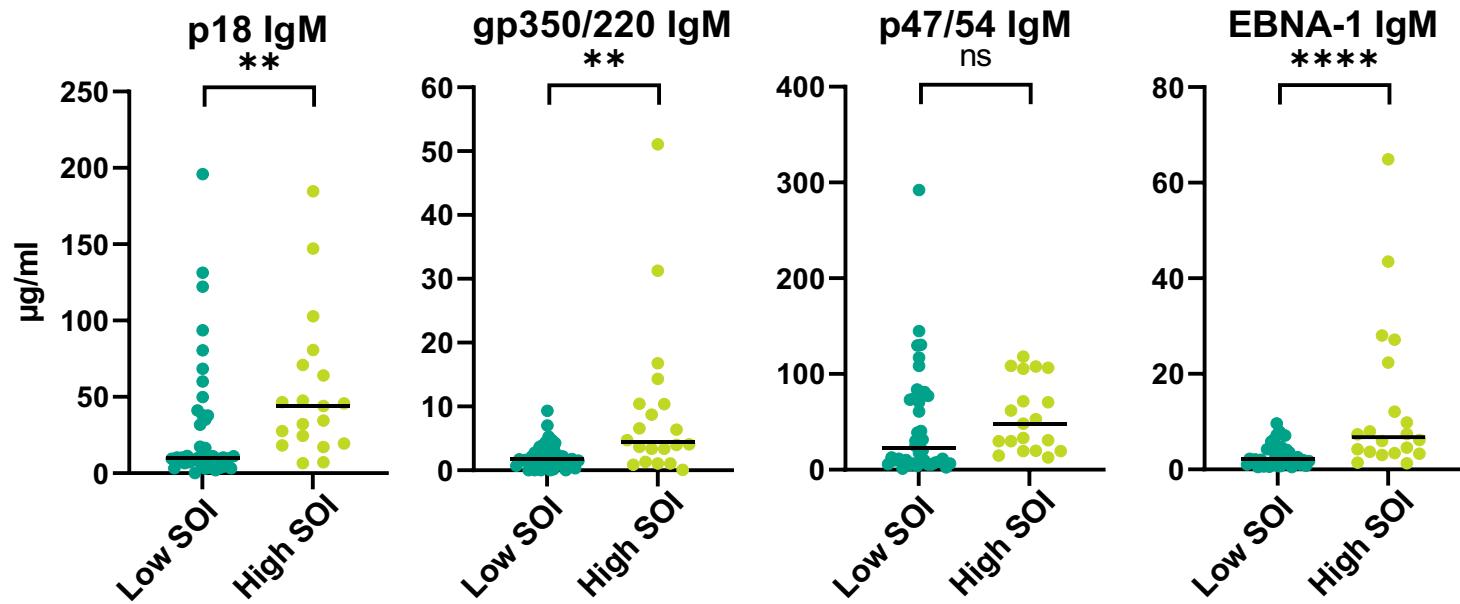**B**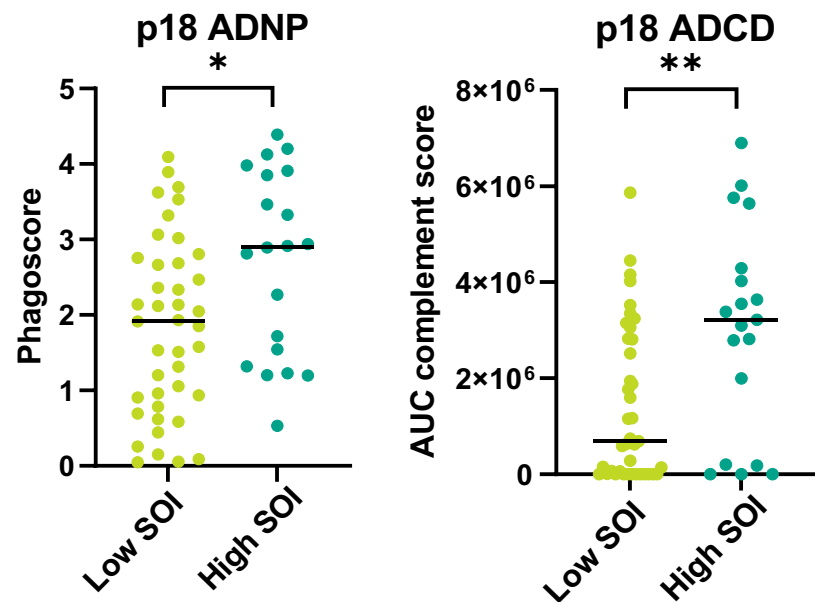

Supplement: ppat.1010738.s005.pdf [file ppat.1010738.s005.pdf]
